# Supplementary material
Source: HighWire-hosted journal article supplement (https://jnm.snmjournals.org/highwire/filestream/94617/field_highwire_adjunct_files/0/130880_Supplemental_Data.pdf)
Supplement: 130880_Supplemental_Data.pdf [file 130880_Supplemental_Data.pdf]

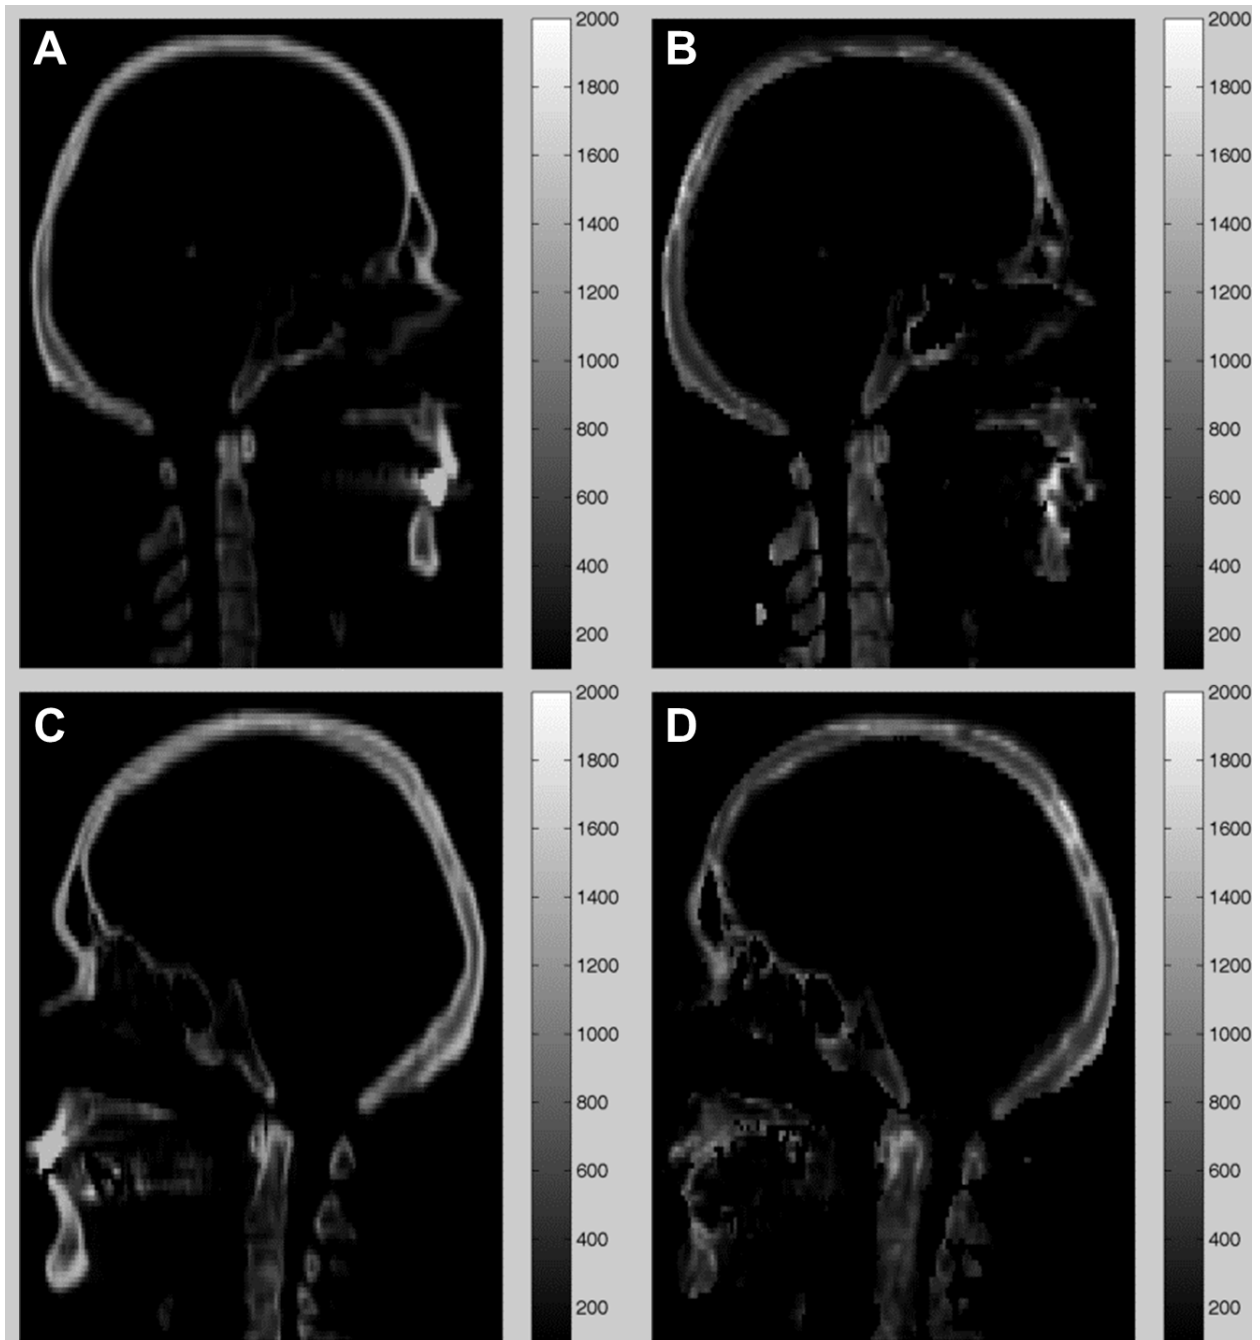

**Supplemental Figure 1** – Sagittal views of CT for two patients (A,C) and corresponding MR-based density estimations (B,D). In this case, the available CT information was used to mask out all voxels below +100 HU. The UTE-derived R2 maps were then automatically rescaled to Hounsfield units.
